# Supplementary material
Source: publisher site journal article supplement (https://jmir.org/api/download?alt_name=cancer_v11i1e60653_app3.pdf&filename=b958e6726b78c9bcdd7facf1e62e7583.pdf)
Supplement: Supplementary file [file download]

**Consolidated criteria for reporting qualitative studies (COREQ): 32-item checklist**

| No. Item                                       | Guide questions/description                                                                                                               | Reported on Page #             |
|------------------------------------------------|-------------------------------------------------------------------------------------------------------------------------------------------|--------------------------------|
| <b>Domain 1: Research team and reflexivity</b> |                                                                                                                                           |                                |
| <i>Personal Characteristics</i>                |                                                                                                                                           |                                |
| 1. Interviewer/facilitator                     | Which author/s conducted the interview or focus group?                                                                                    | 6                              |
| 2. Credentials                                 | What were the researcher's credentials? E.g. PhD, MD                                                                                      | 1,6                            |
| 3. Occupation                                  | What was their occupation at the time of the study?                                                                                       | 6                              |
| 4. Gender                                      | Was the researcher male or female?                                                                                                        | Not reported                   |
| 5. Experience and training                     | What experience or training did the researcher have?                                                                                      | 6                              |
| <i>Relationship with participants</i>          |                                                                                                                                           |                                |
| 6. Relationship established                    | Was a relationship established prior to study commencement?                                                                               | Not reported as not applicable |
| 7. Participant knowledge of the interviewer    | What did the participants know about the researcher? e.g. personal goals, reasons for doing the research                                  | Not reported as not applicable |
| 8. Interviewer characteristics                 | What characteristics were reported about the interviewer/facilitator? e.g. Bias, assumptions, reasons and interests in the research topic | Not reported as not applicable |

|                                          |                                                                                                                                                          |                                                                                                                                               |
|------------------------------------------|----------------------------------------------------------------------------------------------------------------------------------------------------------|-----------------------------------------------------------------------------------------------------------------------------------------------|
| <b>Domain 2: study design</b>            |                                                                                                                                                          |                                                                                                                                               |
| <i>Theoretical framework</i>             |                                                                                                                                                          |                                                                                                                                               |
| 9. Methodological orientation and Theory | What methodological orientation was stated to underpin the study? e.g. grounded theory, discourse analysis, ethnography, phenomenology, content analysis | Page 7                                                                                                                                        |
| <i>Participant selection</i>             |                                                                                                                                                          |                                                                                                                                               |
| 10. Sampling                             | How were participants selected? e.g. purposive, convenience, consecutive, snowball                                                                       | Page 5, 6, and 8                                                                                                                              |
| 11. Method of approach                   | How were participants approached? e.g. face-to-face, telephone, mail, email                                                                              | Page 5                                                                                                                                        |
| 12. Sample size                          | How many participants were in the study?                                                                                                                 | Page 8                                                                                                                                        |
| 13. Non-participation                    | How many people refused to participate or dropped out? Reasons?                                                                                          | Not applicable, reasons reported on page 8                                                                                                    |
| <i>Setting</i>                           |                                                                                                                                                          |                                                                                                                                               |
| 14. Setting of data collection           | Where was the data collected? e.g. home, clinic, workplace                                                                                               | Page 6                                                                                                                                        |
| 15. Presence of non-participants         | Was anyone else present besides the participants and researchers?                                                                                        | Not reported as not applicable (participants were invited to bring a family member or friend with them, but no participants opted to do this) |
| 16. Description of sample                | What are the important characteristics of the sample? e.g. demographic data, date                                                                        | Page 8. Date of interviews on page 6                                                                                                          |
| <i>Data collection</i>                   |                                                                                                                                                          |                                                                                                                                               |
| 17. Interview guide                      | Were questions, prompts, guides provided by the authors? Was it pilot tested?                                                                            | Page 6                                                                                                                                        |
| 18. Repeat interviews                    | Were repeat inter views carried out? If yes, how many?                                                                                                   | Not reported as not applicable                                                                                                                |
| 19. Audio/visual recording               | Did the research use audio or visual recording to collect the data?                                                                                      | Page 6                                                                                                                                        |
| 20. Field notes                          | Were field notes made during and/or after the inter view or focus group?                                                                                 | Page 6/7                                                                                                                                      |
| 21. Duration                             | What was the duration of the inter views or focus group?                                                                                                 | Not reported                                                                                                                                  |

|                                        |                                                                                                                                 |                                                                    |
|----------------------------------------|---------------------------------------------------------------------------------------------------------------------------------|--------------------------------------------------------------------|
| 22. Data saturation                    | Was data saturation discussed?                                                                                                  | Yes but we moved away from this concept, see page 6/7              |
| 23. Transcripts returned               | Were transcripts returned to participants for comment and/or correction?                                                        | Not reported as not applicable                                     |
| <b>Domain 3: analysis and findings</b> |                                                                                                                                 |                                                                    |
| <i>Data analysis</i>                   |                                                                                                                                 |                                                                    |
| 24. Number of data coders              | How many data coders coded the data?                                                                                            | Page 7                                                             |
| 25. Description of the coding tree     | Did authors provide a description of the coding tree?                                                                           | Page 7                                                             |
| 26. Derivation of themes               | Were themes identified in advance or derived from the data?                                                                     | Page 7                                                             |
| 27. Software                           | What software, if applicable, was used to manage the data?                                                                      | Page 7                                                             |
| 28. Participant checking               | Did participants provide feedback on the findings?                                                                              | Not reported as not applicable                                     |
| <i>Reporting</i>                       |                                                                                                                                 |                                                                    |
| 29. Quotations presented               | Were participant quotations presented to illustrate the themes/findings? Was each quotation identified? e.g. participant number | Pages 12, 13, 14,15, 18, 19, and 20                                |
| 30. Data and findings consistent       | Was there consistency between the data presented and the findings?                                                              | See results section pages 9-20                                     |
| 31. Clarity of major themes            | Were major themes clearly presented in the findings?                                                                            | See results section pages 9-15                                     |
| 32. Clarity of minor themes            | Is there a description of diverse cases or discussion of minor themes?                                                          | See results section pages 15-20 and discussion section pages 21-25 |
